# Supplementary material
Source: Springer Nature journal article supplement (https://www.springermedizin.de/resource/supplementary/12936_2008_676_MOESM2_ESM.pdf/9547984)
Supplement: MOESM2 [file 9547984]

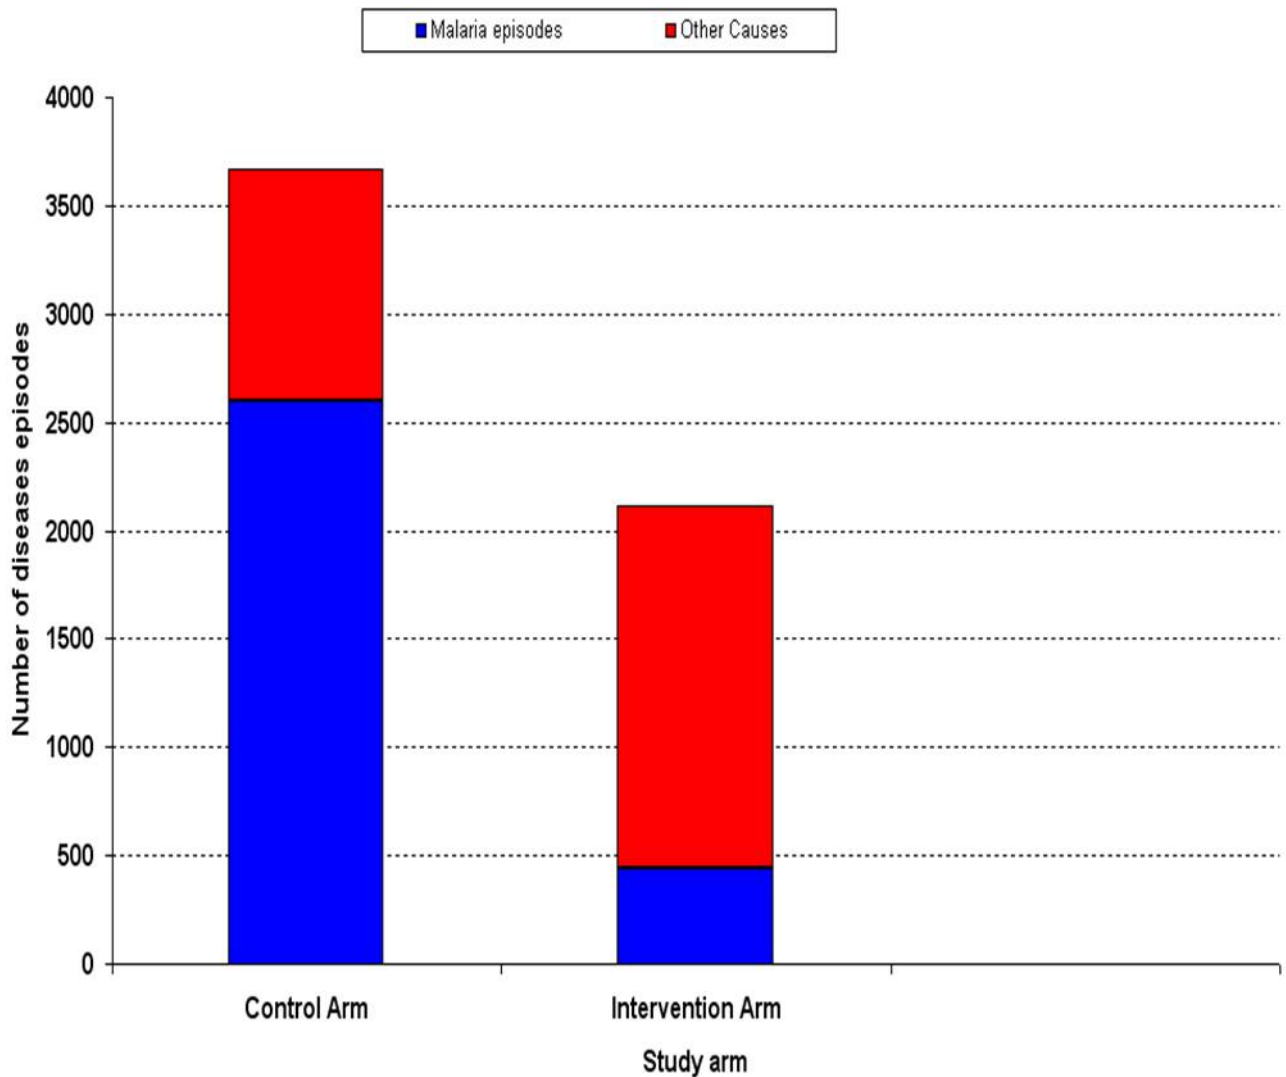

**Figure 2:** Number of diseases episodes (all causes) and malaria episodes treated at the health facility level
